# Supplementary material for: Facile template-free preparation of silver-coated Cu3SbS4 hollow spheres with enhanced photoelectric properties
Source: Royal Society of Chemistry journal article supplement (doi:10.1039/d1tc04098g), 2021-11-23
Supplement: d1tc04098g1.pdf [file d1tc04098g1.pdf]

# Facile Template-free Preparation of Silver-coated $\text{Cu}_3\text{SbS}_4$ Hollow Spheres with Enhanced Photoelectric Properties

Xiang Meng<sup>a</sup>, Xihao Chen<sup>a, b</sup>, Jiang Cheng<sup>a</sup>, Fuqiang Zhai<sup>a</sup>, Wen Li<sup>c</sup>, Rui Hu<sup>d</sup>, Lu Li<sup>a,\*</sup>

<sup>a</sup>*School of Material Science and Engineering, Chongqing University of Arts and Sciences, Chongqing 402160, China.*

<sup>b</sup>*Department of Physics, Chongqing University, Chongqing, 400044, China*

<sup>c</sup>*Interdisciplinary Materials Research Center, School of Materials Science and Engineering, Tongji Univ., 4800 Caoan Rd., Shanghai 201804, China*

<sup>d</sup>*Key Laboratory of Photovoltaic and Energy Conservation Materials, Institute of Solid State Physics, Hefei Institutes of Physical Science, Chinese Academy of Sciences, Hefei 230031, China*

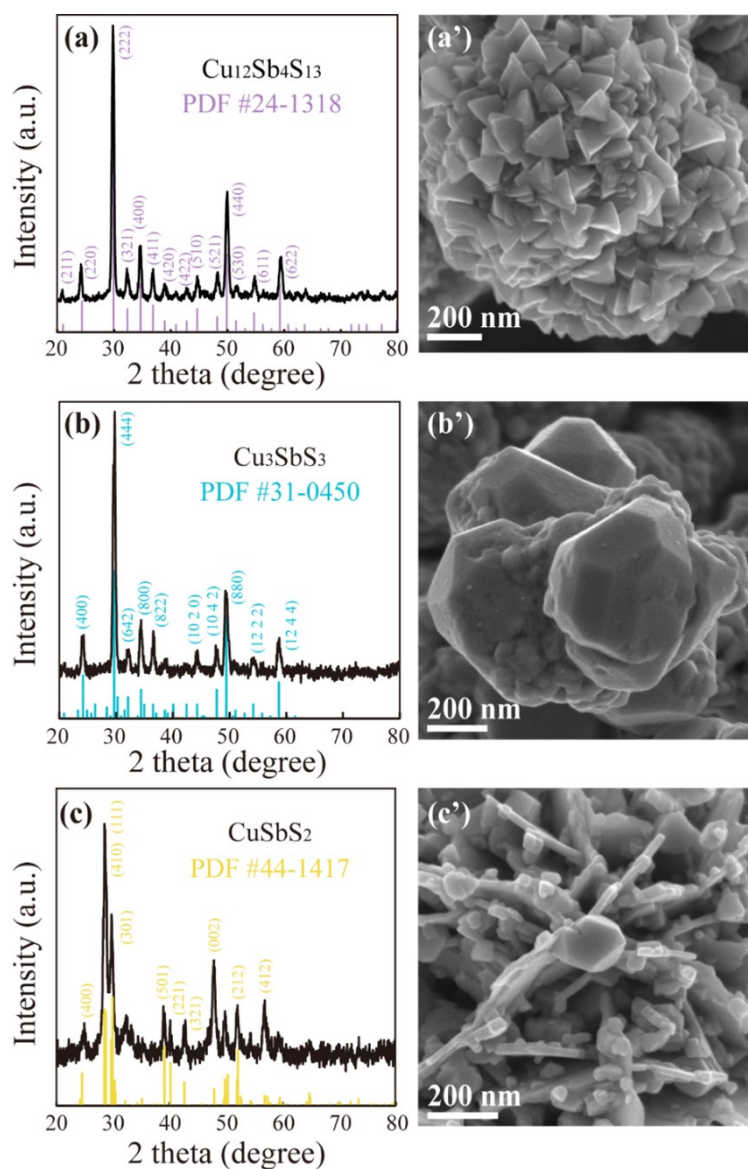

Figure S1. XRD patterns of the as-synthesized (a)  $\text{Cu}_{12}\text{Sb}_4\text{S}_{13}$ , (b)  $\text{Cu}_3\text{SbS}_3$  and (c)  $\text{CuSbS}_2$  by solvothermal method along with the standard reference pattern as #24-1318, #31-0450 and #44-1417, respectively, SEM images of (a')  $\text{Cu}_{12}\text{Sb}_4\text{S}_{13}$ , (b')  $\text{Cu}_3\text{SbS}_3$  and (c')  $\text{CuSbS}_2$ . High-purity Cu-Sb-S phases were formed and distinguishing morphology (including configuration and size) could be recognized from SEM images.

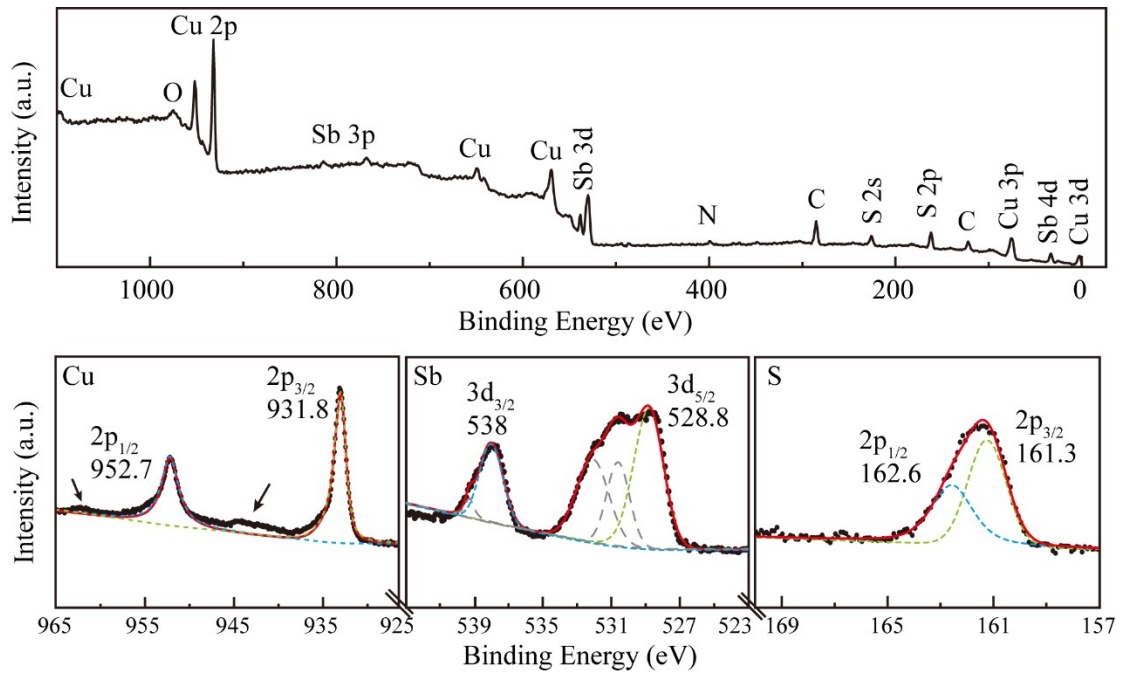

Figure S2. XPS spectra of the as-synthesized  $\text{Cu}_{12}\text{Sb}_4\text{S}_{13}$  nanocrystals including the survey spectrum along with the corresponding high-resolution XPS spectra for Cu 2p, Sb 3d and S 2p core levels.

Calculation of Ag content:

The relative content of Ag and  $\text{Cu}_3\text{SbS}_4$  in the composites can be calculated by the K value method, and the formula is described as follows<sup>1</sup>:

$$I_A/I_S = k \times W_A/W_S$$

Where I is the diffraction peak intensity, W is the weight percentage, and k is a constant value. The k value could be obtained from the standard PDF card. Both 0.5 vol% Ag and 1 vol% Ag content in the composites could be roughly estimated from XRD patterns.

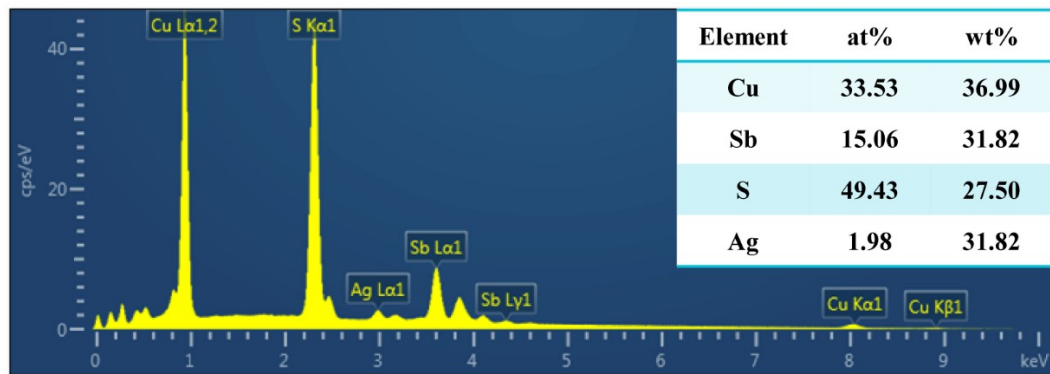

Figure S3. EDS result for the elemental mapping image along with the relative chemical composition of the as-synthesized Ag-coated  $\text{Cu}_3\text{SbS}_4$  nanocrystals hollow spheres.

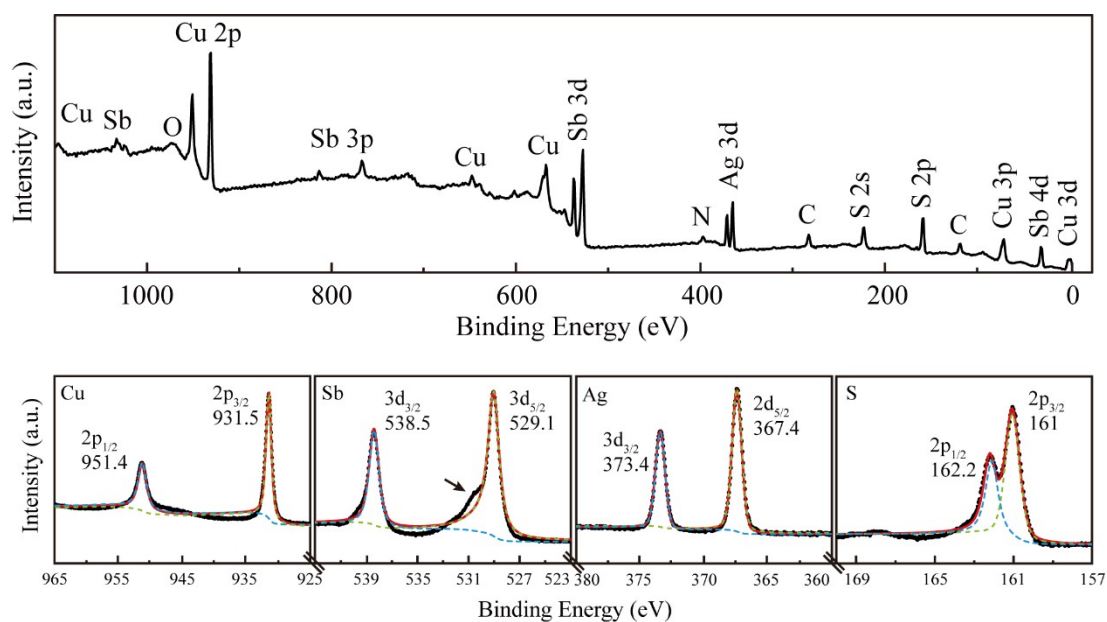

Figure S4. XPS spectra of the as-synthesized Ag-coated  $\text{Cu}_3\text{SbS}_4$  nanocrystals hollow spheres including the survey spectrum along with the corresponding high-resolution XPS spectra for Cu 2p, Sb 3d, Ag 2d and S 2p core levels. A relatively small satellite peak at 530.6 eV appeared, which means a very little reduction of  $\text{Sb}^{5+}$  into  $\text{Sb}^{3+}$  by sodium borohydride. The change has not been mentioned in the main body due to a relatively small change.

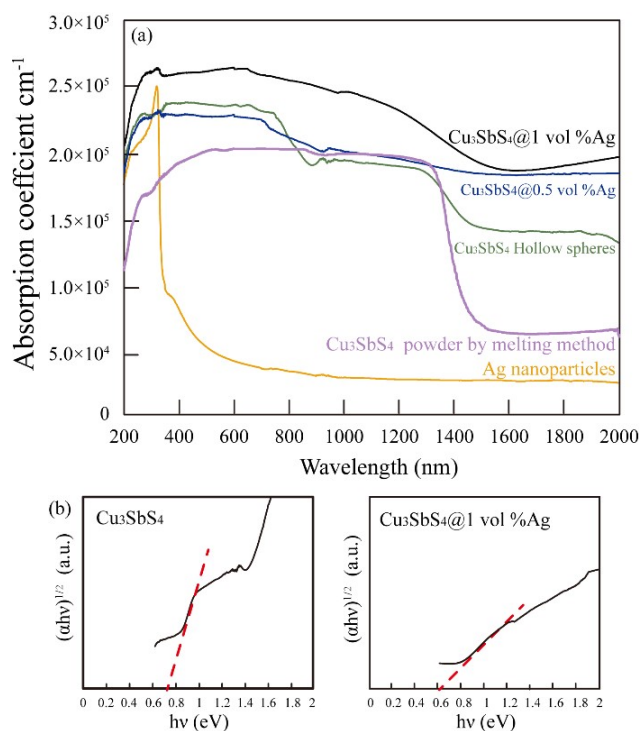

Figure S5. (a) UV-Vis-NIR spectra of Ag nanoparticles,  $\text{Cu}_3\text{SbS}_4$  powder by melting method,  $\text{Cu}_3\text{SbS}_4$  nanocrystals hollow spheres, 0.5 vol % Ag-coated  $\text{Cu}_3\text{SbS}_4$  and 1 vol % Ag-coated  $\text{Cu}_3\text{SbS}_4$ , the corresponding Tauc plot of  $(\alpha hv)^{1/2}$  versus  $(hv)$  of the as-synthesized (b)  $\text{Cu}_3\text{SbS}_4$  nanocrystals hollow spheres and (c) Ag-coated ones.

Given the absorption spectrum of Ag clusters, the Ag nanoparticles with sphere structure possessed a broad peak at 400 nm for surface plasmon resonance<sup>2</sup>. The broad peaks located around 320 nm and 900 nm attributed to the in-plane dipole plasmon and out-of-plane quadrupole resonances, respectively, which suggested the formation of Ag with triangular nanoprism structure<sup>3</sup>. This could be possibly aroused from geometry of Cu<sub>3</sub>SbS<sub>4</sub> nanoparticles precursor.

Calculation of optical band gap:

The optical bandgap of the film is determined from the absorption coefficient using

$$\alpha^m = A(h\nu - E_g) \quad (1)$$

where  $A$  is a constant,  $m$  is the transition probability,  $E_g$  is the optical band gap<sup>4</sup>. The value of  $n$  could be 1/2 or 2 for allowed indirect or direct transitions, respectively. From the experimental results and theoretical calculations for band structure,  $n = 1/2$  for Cu<sub>3</sub>SbS<sub>4</sub> with an indirect transition was chosen<sup>5-8</sup>. The bandgap of samples is determined from the plot of  $(\alpha \cdot h\nu)^2$  versus photon energy by extrapolating to  $\alpha \cdot h\nu = 0$ .

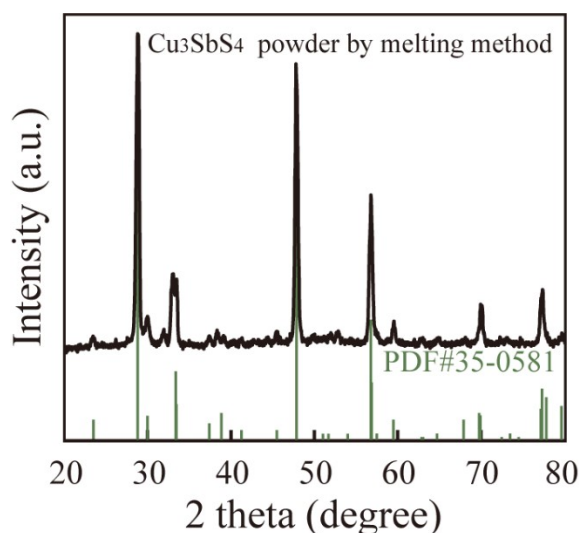

Figure S6. XRD pattern of the as-synthesized bulk Cu<sub>3</sub>SbS<sub>4</sub> by melting method, a small quantity of Cu<sub>12</sub>Sb<sub>4</sub>S<sub>13</sub> was detected. Polycrystalline sample of Cu<sub>3</sub>SbS<sub>4</sub> was synthesized by the stoichiometric amount of high purity elements (>99.99%) at 1173K for 24h, cooled down to 673K and held on for 2d. The obtained ingots were hand-ground into fine powder for hot pressing at 673 K for 20 min under a uniaxial pressure of 80 MPa.

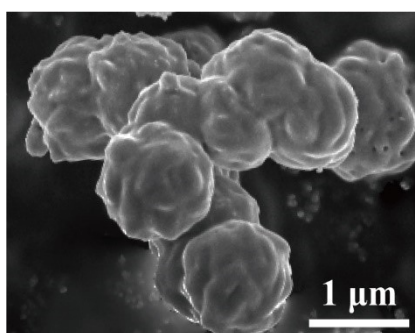

Figure S7. SEM images of the smaller spherical aggregation of crystals by only 5 min duration

time at high temperature

Table S1. The representative preparation method, structural properties and optical band gap (indirect) of  $\text{Cu}_3\text{SbS}_4$

| Method                                          | Size of crystals (nm) | Shape of crystals       | Form                                              | valence state | Optical band gap (eV) | Application                               | Ref. |
|-------------------------------------------------|-----------------------|-------------------------|---------------------------------------------------|---------------|-----------------------|-------------------------------------------|------|
| Solvothermal method                             | 200                   | -                       | Powder                                            |               | 1                     | -                                         | 9    |
| Solvothermal method                             | 26-32                 | sphere                  | Powder                                            |               | 0.88-1                | -                                         | 10   |
| Solvothermal method                             | 20                    | -                       | Film (SC)                                         |               | 0.82                  | -                                         | 11   |
| hydrothermal                                    | 40-60 in thickness    | nanofibers              | Powder                                            |               | -                     | -                                         | 12   |
| Hot-injection                                   | 10.2±1.1              | spherical               | Powder                                            | 1 3 2         | 0.9                   | -                                         | 6    |
| Hot-injection                                   | 10                    | spherical               | Powder                                            | 1 3 2         | 1                     | -                                         | 13   |
| Hot-injection                                   | 10.5±1.7              | spherical               | Powder                                            |               | 1.72                  | -                                         | 14   |
| Hot-injection                                   | 23±4                  | oblates                 | Powder                                            |               | 1.2                   | -                                         | 5    |
| Hot-injection                                   | 61±19                 | irregular to tetragonal | Powder                                            | 1 3 2         | 1.33                  | -                                         | 15   |
| Hot-injection                                   | 5.95±0.67             | dots                    | Powder                                            |               | 1.5                   | -                                         | 7    |
|                                                 | 4.81±0.52             |                         |                                                   |               | 1.6                   |                                           |      |
|                                                 | 3.37±0.46             |                         |                                                   |               | 1.7                   |                                           |      |
| Hot-injection                                   | 4.72±0.52             | Quasi-spherical         | Powder                                            |               | 1.4                   | For optoelectronic devices                | 16   |
| Hot-injection                                   | 14-20                 | -                       | Film (spray deposited method using chlorobenzene) |               | 0.89                  | Hole transporting material in solar cells | 17   |
| Hot-injection                                   | 21.5±8.0              | Round-like              | Powder                                            |               | ≥1                    | -                                         | 8    |
| Hot-injection                                   | 19                    | -                       | Film (SC)                                         | 1 5 2         | 0.9                   | Absorber layer in TFSC                    | 18   |
| Microwave radiation                             | 30-50                 | sphere-like             | Powder                                            | 1 5 2         | 1.1                   | -                                         | 19   |
| Mechanical alloying with spark plasma sintering | ≥1000                 | -                       | Powder                                            | 1 5 2         | 0.85                  | Thermoelectric materials                  | 20   |
| Deep eutectic solvents synthetic approach       | ~7                    | nearly spherical        | -                                                 | 1 5 2         | 1.23                  | Water-splitting                           | 21   |
| RF magnetron sputtering with Sulfurization      | ≥1000                 | -                       | Film                                              |               | 0.89±0.01             | -                                         | 22   |
| Electron-beam evaporation with Sulfurization    | ≥1000                 | -                       | Film                                              |               | 0.88                  | -                                         | 23   |
| Magnetron                                       | 50±30                 | -                       | Film                                              |               | 0.94-0.97             | For TFSC                                  | 24   |

Where, TFSC is the abbreviation for thin film solar cells, SC is the abbreviation for spin-coating,  $\geq 1000$  means that the size of crystals was calculated roughly by us from SEM results in these papers and close to micrometer. The form is the state of  $\text{Cu}_3\text{SbS}_4$  when the UV-Vis measurement was conducted. Three numbers in valence state column are corresponding to valence states of element Cu, Sb and S in  $\text{Cu}_3\text{SbS}_4$ , respectively.

Reference:

- 1 C. R. Hubbard and R. L. Snyder, *Powder Diffr.*, 1988, **3**, 74–77.
- 2 H. Bi, W. Cai, L. Zhang, D. Martin and F. Träger, *Appl. Phys. Lett.*, 2002, **81**, 5222–5224.
- 3 J. Liu, X. Li and X. Zeng, *J. Alloys Compd.*, 2010, **494**, 84–87.
- 4 E. A. Davis and N. F. Mott, *Philos. Mag.*, 1970, **22**, 0903–0922.
- 5 K. Ramasamy, H. Sims, W. H. Butler and A. Gupta, *Chem. Mater.*, 2014, **26**, 2891–2899.
- 6 J. van Embden and Y. Tachibana, *J. Mater. Chem.*, 2012, **22**, 11466.
- 7 K. Chen, J. Zhou, W. Chen, Q. Chen, P. Zhou and Y. Liu, *Nanoscale*, 2016, **8**, 5146–5152.
- 8 F. Baum, T. Pretto, A. G. Brolo and M. J. L. Santos, *Cryst. Growth Des.*, 2018, **18**, 6521–6527.
- 9 L. Shi, C. Wu, J. Li and J. Ding, *J. Alloys Compd.*, 2017, **694**, 132–135.
- 10 J. Bincy, G. S. G. and L. R. A., *Mater. Res. Bull.*, 2017, **95**, 267–276.
- 11 M. Bella, C. Rivero, S. Blayac, H. Basti, M. C. Record and P. Boulet, *Mater. Res. Bull.*, 2017, **90**, 188–194.
- 12 C. An, Y. Jin, K. Tang and Y. Qian, *J. Mater. Chem.*, 2003, **13**, 301–303.
- 13 J. van Embden, K. Latham, N. W. Duffy and Y. Tachibana, *J. Am. Chem. Soc.*, 2013, **135**, 11562–11571.
- 14 S. Ikeda, S. Sogawa, Y. Tokai, W. Septina, T. Harada and M. Matsumura, *RSC Adv*, 2014, **4**, 40969–40972.
- 15 Q. Liang, K. Huang, X. Ren, W. Zhang, R. Xie and S. Feng, *CrystEngComm*, 2016, **18**, 3703–3710.
- 16 F. Zhang, K. Chen, X. Jiang, Y. Wang, Y. Ge, L. Wu, S. Xu, Q. Bao and H. Zhang, *J. Mater. Chem. C*, 2018, **6**, 8977–8983.
- 17 Q. Zeng, Y. Di, C. Huang, K. Sun, Y. Zhao, H. Xie, D. Niu, L. Jiang, X. Hao, Y. Lai and F. Liu, *J. Mater. Chem. C*, 2018, **6**, 7989–7993.
- 18 G. H. Albuquerque, K.-J. Kim, J. I. Lopez, A. Devaraj, S. Manandhar, Y.-S. Liu, J. Guo, C.-H. Chang and G. S. Herman, *J. Mater. Chem. A*, 2018, **6**, 8682–8692.
- 19 G. Chen, W. Wang, J. Zhao, W. Yang, S. Chen, Z. Huang, R. Jian and H. Ruan, *J. Alloys Compd.*, 2016, **679**, 218–224.
- 20 M. Shen, S. Lu, Z. Zhang, H. Liu, W. Shen, C. Fang, Q. Wang, L. Chen, Y. Zhang and X. Jia, *ACS Appl. Mater. Interfaces*, 2020, **12**, 8271–8279.
- 21 U. V. Ghorpade, M. P. Suryawanshi, S. W. Shin, X. Wang, E. Jo, H. Bae, K. Park, J.-S. Ha, S. S. Kolekar and J. H. Kim, *J. Mater. Chem. A*, 2018, **6**, 19798–19809.
- 22 P. A. Fernandes, A. Shongalova, A. F. da Cunha, J. P. Teixeira, J. P. Leitão, J. M. V. Cunha, S. Bose, P. M. P. Salomé and M. R. Correia, *J. Alloys Compd.*, 2019, **797**, 1359–1366.
- 23 L. Yu, R. S. Kokenyesi, D. A. Keszler and A. Zunger, *Adv. Energy Mater.*, 2013, **3**, 43–48.
- 24 N. D. Franzer, N. R. Paudel, C. Xiao and Y. Yan, in *2014 IEEE 40th Photovoltaic Specialist Conference (PVSC)*, IEEE, Denver, CO, USA, 2014, pp. 2326–2328.
